# Supplementary material for: Lipid scrambling is a general feature of protein insertases
Source: PubMed Central journal article supplement — Proc Natl Acad Sci U S A. 2024 Apr 15;121(17):e2319476121. doi: 10.1073/pnas.2319476121 (PMC11047089; doi:10.1073/pnas.2319476121), 2024-04-15
Supplement: pnas.2319476121.sapp.pdf [file pnas.2319476121.sapp.pdf]

**Table S1.** Details about all simulated systems. Systems for which the uniprot ID is provided means that the available AlphaFold (AF) model was used. All oligomers were predicted with AF multimer. The number of chains in each system is in parentheses. Total events are computed after removing the first 2 microseconds (equilibration) in each replica.

| ID | System<br>(number of chains) | Organism             | Source<br>(Uniprot ID, PDB<br>code or AlphaFold) | Total # of<br>DOPC lipids | Total<br>events | MD run<br>length |
|----|------------------------------|----------------------|--------------------------------------------------|---------------------------|-----------------|------------------|
| 1  | TMEM16K (2)                  | <i>H. sapiens</i>    | PDB: 5OC9                                        | 1000                      | 251             | 20 $\mu$ s       |
| 2  | TMEM16K (2)                  | <i>H. sapiens</i>    | PDB: 6R65                                        | 1000                      | 278             | 20 $\mu$ s       |
| 3  | TMEM16K (2)                  | <i>H. sapiens</i>    | PDB: 6R7X                                        | 1000                      | 10              | 20 $\mu$ s       |
| 4  | TMEM16K (2)                  | <i>H. sapiens</i>    | PDB: 6R7Y                                        | 1000                      | 7               | 20 $\mu$ s       |
| 5  | TMEM16K (2)                  | <i>H. sapiens</i>    | PDB: 6R7Z                                        | 1000                      | 28              | 20 $\mu$ s       |
| 6  | TMEM16F (2)                  | <i>M. musculus</i>   | PDB: 8B8Q                                        | 800                       | 27              | 20 $\mu$ s       |
| 7  | TMEM16A (2)                  | <i>M. musculus</i>   | PDB: 7ZK3                                        | 800                       | 29              | 20 $\mu$ s       |
| 8  | TMEM41B (1)                  | <i>H. sapiens</i>    | ID: Q5BJD5                                       | 600                       | 22              | 20 $\mu$ s       |
| 9  | VMP1 (1)                     | <i>H. sapiens</i>    | ID: Q96GC9                                       | 600                       | 24              | 20 $\mu$ s       |
| 10 | TMEM41B - VMP1 (2)           | <i>H. sapiens</i>    | ID: Q5BJD5<br>ID: Q96GC9                         | 800                       | 31              | 20 $\mu$ s       |
| 11 | ATG9 (3)                     | <i>S. pombe</i>      | PDB: 7D0I                                        | 1200                      | 175             | 20 $\mu$ s       |
| 12 | ATG9A (3)                    | <i>H. sapiens</i>    | PDB: 6WQZ                                        | 1200                      | 93              | 20 $\mu$ s       |
| 13 | VDAC1 (1)                    | <i>H. sapiens</i>    | PDB: 6G6U                                        | 600                       | 24              | 20 $\mu$ s       |
| 14 | VDAC1 (2)                    | <i>H. sapiens</i>    | PDB: 6G6U                                        | 800                       | 161             | 20 $\mu$ s       |
| 15 | VDAC2 (1)                    | <i>D. rerio</i>      | PDB: 4BUM                                        | 800                       | 25              | 20 $\mu$ s       |
| 16 | VDAC2 (2)                    | <i>D. rerio</i>      | PDB: 4BUM                                        | 800                       | 231             | 20 $\mu$ s       |
| 17 | VDAC3 (1)                    | <i>H. sapiens</i>    | ID: Q9Y277                                       | 800                       | 24              | 20 $\mu$ s       |
| 18 | VDAC3 (2)                    | <i>H. sapiens</i>    | ID: Q9Y277                                       | 800                       | 319             | 20 $\mu$ s       |
| 19 | Rhodopsin (1)                | <i>B. taurus</i>     | PDB: 4A4M                                        | 800                       | 19              | 20 $\mu$ s       |
| 20 | Rhodopsin (2)                | <i>B. taurus</i>     | PDB: 4A4M                                        | 800                       | 39              | 20 $\mu$ s       |
| 21 | MCP1 (1)                     | <i>S. cerevisiae</i> | ID: Q12106                                       | 600                       | 26              | 20 $\mu$ s       |
| 22 | MCP1 (2)                     | <i>S. cerevisiae</i> | ID: Q12106                                       | 800                       | 33              | 20 $\mu$ s       |
| 23 | Xk (1)                       | <i>H. sapiens</i>    | ID: P51811                                       | 800                       | 9               | 20 $\mu$ s       |
| 24 | Xkr8 (1)                     | <i>H. sapiens</i>    | PDB: 7DCE                                        | 800                       | 11              | 20 $\mu$ s       |

|    |                   |                      |            |      |    |            |
|----|-------------------|----------------------|------------|------|----|------------|
| 25 | Xkr9 (1)          | <i>R. norvegicus</i> | PDB: 7P16  | 800  | 8  | 20 $\mu$ s |
| 26 | GlpG (1)          | <i>E. coli</i>       | PDB: 3B45  | 600  | 3  | 20 $\mu$ s |
| 27 | Spns1 (1)         | <i>H. sapiens</i>    | ID: Q9H2V7 | 800  | 3  | 20 $\mu$ s |
| 28 | MFSD2A (1)        | <i>H. sapiens</i>    | PDB: 7OIX  | 800  | 5  | 20 $\mu$ s |
| 29 | ABCB1 (1)         | <i>H. sapiens</i>    | PDB: 7A69  | 1000 | 4  | 20 $\mu$ s |
| 30 | ABCB4 (4)         | <i>H. sapiens</i>    | PDB: 6S7P  | 800  | 9  | 20 $\mu$ s |
| 31 | ABCB11 (11)       | <i>H. sapiens</i>    | PDB: 6LR0  | 800  | 8  | 20 $\mu$ s |
| 32 | ABCG40 (1)        | <i>A. thaliana</i>   | ID: Q9M9E1 | 1200 | 2  | 20 $\mu$ s |
| 33 | MsbA (2)          | <i>E. coli</i>       | PDB: 7PH4  | 800  | 1  | 20 $\mu$ s |
| 34 | PglK (2)          | <i>C. jejuni</i>     | PDB: 5C73  | 800  | 15 | 20 $\mu$ s |
| 35 | PglK (2)          | <i>C. jejuni</i>     | PDB: 5C76  | 1000 | 18 | 20 $\mu$ s |
| 36 | PglK (2)          | <i>C. jejuni</i>     | PDB: 5C78  | 1000 | 19 | 20 $\mu$ s |
| 37 | SERCA2b (1)       | <i>H. sapiens</i>    | PDB: 7E7S  | 800  | 9  | 20 $\mu$ s |
| 38 | DGGGP (1)         | <i>M. jannaschii</i> | PDB: 6M31  | 800  | 1  | 20 $\mu$ s |
| 39 | DGGGP (2)         | <i>M. jannaschii</i> | PDB: 6M31  | 800  | 1  | 20 $\mu$ s |
| 40 | Drs2p (1)         | <i>S. cerevisiae</i> | PDB: 6ROH  | 1200 | 8  | 20 $\mu$ s |
| 41 | Drs2p (1)         | <i>S. cerevisiae</i> | PDB: 6ROI  | 1200 | 7  | 20 $\mu$ s |
| 42 | Drs2p (1)         | <i>S. cerevisiae</i> | PDB: 6ROJ  | 1000 | 3  | 20 $\mu$ s |
| 43 | VAMP2 (1)         | <i>H. sapiens</i>    | ID: P63027 | 600  | 0  | 20 $\mu$ s |
| 44 | VAMP2 (2)         | <i>H. sapiens</i>    | ID: P63027 | 1000 | 2  | 20 $\mu$ s |
| 45 | YidC (1)          | <i>B. halodurans</i> | PDB: 3WO6  | 600  | 16 | 20 $\mu$ s |
| 46 | YidC<br>R72A (1)  | <i>B. halodurans</i> | PDB: 3WO6  | 800  | 8  | 20 $\mu$ s |
| 47 | YidC (1)          | <i>B. halodurans</i> | PDB: 3WO7  | 800  | 10 | 20 $\mu$ s |
| 48 | MisCB (1)         | <i>B. subtilis</i>   | ID: P54544 | 800  | 33 | 20 $\mu$ s |
| 49 | Oxa1 (1)          | <i>S. cerevisiae</i> | ID: P39952 | 800  | 45 | 20 $\mu$ s |
| 50 | OXA1L (1)         | <i>H. sapiens</i>    | PDB: 6ZM5  | 800  | 18 | 20 $\mu$ s |
| 51 | OXA1L-peptide (2) | <i>H. sapiens</i>    | PDB: 6ZM5  | 800  | 0  | 20 $\mu$ s |
| 52 | Cox18 (1)         | <i>S. cerevisiae</i> | ID: P53239 | 800  | 47 | 20 $\mu$ s |

|    |                                                                                                     |                      |                          |      |     |            |
|----|-----------------------------------------------------------------------------------------------------|----------------------|--------------------------|------|-----|------------|
| 53 | Alb3 (1)                                                                                            | <i>A. thaliana</i>   | ID: Q8LBP4               | 800  | 24  | 20 $\mu$ s |
| 54 | Emc1 (1)                                                                                            | <i>S. cerevisiae</i> | PDB: 6WB9                | 800  | 0   | 20 $\mu$ s |
| 55 | Emc3 (1)                                                                                            | <i>S. cerevisiae</i> | PDB: 6WB9                | 800  | 113 | 20 $\mu$ s |
| 56 | Emc4 (1)                                                                                            | <i>S. cerevisiae</i> | PDB: 6WB9                | 800  | 115 | 20 $\mu$ s |
| 57 | Emc5 (1)                                                                                            | <i>S. cerevisiae</i> | PDB: 6WB9                | 800  | 0   | 20 $\mu$ s |
| 58 | Emc6 (1)                                                                                            | <i>S. cerevisiae</i> | PDB: 6WB9                | 800  | 1   | 20 $\mu$ s |
| 59 | EMC complex (8)                                                                                     | <i>S. cerevisiae</i> | PDB: 6WB9                | 1000 | 170 | 20 $\mu$ s |
| 60 | Get1 (1)                                                                                            | <i>S. cerevisiae</i> | ID: P53192               | 800  | 56  | 20 $\mu$ s |
| 61 | Get1 (1)<br>F113L W147L W189L                                                                       | <i>S. cerevisiae</i> | ID: P53192               | 600  | 85  | 20 $\mu$ s |
| 62 | Get1 (1)<br>F113L G120L W147L G185L<br>W189L                                                        | <i>S. cerevisiae</i> | ID: P53192               | 600  | 22  | 20 $\mu$ s |
| 63 | Get1 (1)<br>K16L Q19L R104L K116L<br>W189L N193L N196L<br>Q199L                                     | <i>S. cerevisiae</i> | ID: P53192               | 800  | 36  | 20 $\mu$ s |
| 64 | Get1 (1)<br>T109L K116L K121L W147L<br>Y149L S183L G185L W189L<br>N193L N196L                       | <i>S. cerevisiae</i> | ID: P53192               | 800  | 0   | 20 $\mu$ s |
| 65 | Get2 (1)                                                                                            | <i>S. cerevisiae</i> | ID: P40056               | 800  | 7   | 20 $\mu$ s |
| 66 | Get1 - Get2 (2)                                                                                     | <i>S. cerevisiae</i> | ID: P53192<br>ID: P40056 | 800  | 71  | 20 $\mu$ s |
| 67 | GET complex (4)                                                                                     | <i>S. cerevisiae</i> | ID: P53192<br>ID: P40056 | 800  | 142 | 20 $\mu$ s |
| 68 | GET complex (4)<br>R148L K328L R416L K428<br>K433L E511L                                            | <i>S. cerevisiae</i> | ID: P53192<br>ID: P40056 | 800  | 176 | 20 $\mu$ s |
| 69 | GET complex (4)<br>T421L K428L K433L W459L<br>Y461L S495L G497L W501L<br>N505L N508L                | <i>S. cerevisiae</i> | ID: P53192<br>ID: P40056 | 800  | 22  | 20 $\mu$ s |
| 70 | GET complex (4)<br>T421L K428L G432L K433L<br>G458L W459L Y461L S495L<br>G497L W501L N505L<br>N508L | <i>S. cerevisiae</i> | ID: P53192<br>ID: P40056 | 800  | 22  | 20 $\mu$ s |
| 71 | WRB (1)                                                                                             | <i>H. sapiens</i>    | PDB: 6SO5                | 800  | 7   | 20 $\mu$ s |

|    |                                                                                                    |                      |                         |      |     |       |
|----|----------------------------------------------------------------------------------------------------|----------------------|-------------------------|------|-----|-------|
| 72 | CAML (1)                                                                                           | <i>H. sapiens</i>    | PDB: 6SO5               | 800  | 2   | 20 µs |
| 73 | WRB - CAML (2)                                                                                     | <i>H. sapiens</i>    | PDB: 6SO5               | 800  | 22  | 20 µs |
| 74 | WRB - CAML (4)                                                                                     | <i>H. sapiens</i>    | PDB: 6SO5               | 800  | 55  | 20 µs |
| 75 | TRC complex (6)                                                                                    | <i>H. sapiens</i>    | PDB: 6SO5               | 800  | 39  | 20 µs |
| 76 | TMCO1 (1)                                                                                          | <i>H. sapiens</i>    | PDB: 6W6L               | 600  | 70  | 20 µs |
| 77 | C20orf24 (1)                                                                                       | <i>H. sapiens</i>    | PDB: 6W6L               | 600  | 14  | 20 µs |
| 78 | GEL complex (2)                                                                                    | <i>H. sapiens</i>    | PDB: 6W6L               | 800  | 80  | 20 µs |
| 79 | Nicalin (1)                                                                                        | <i>H. sapiens</i>    | PDB: 6W6L               | 600  | 0   | 20 µs |
| 80 | NOMO (1)                                                                                           | <i>H. sapiens</i>    | PDB: 6W6L               | 600  | 0   | 20 µs |
| 81 | TMEM147 (1)                                                                                        | <i>H. sapiens</i>    | PDB: 6W6L               | 600  | 12  | 20 µs |
| 82 | BOS complex (3)                                                                                    | <i>H. sapiens</i>    | PDB: 6W6L               | 800  | 19  | 20 µs |
| 83 | PAT complex (2)                                                                                    | <i>H. sapiens</i>    | ID: Q9Y284<br>PDB: 6W6L | 800  | 5   | 20 µs |
| 84 | Asterix (1)                                                                                        | <i>H. sapiens</i>    | ID: Q9Y284              | 600  | 121 | 20 µs |
| 85 | Asterix (1)<br>M37L N38L M42L S45L<br>M46L M50L Q79L M80L<br>M81L S82L S83L M85L<br>S89L M93L S94L | <i>H. sapiens</i>    | ID: Q9Y284              | 800  | 27  | 20 µs |
| 86 | CCDC47 (1)                                                                                         | <i>H. sapiens</i>    | PDB: 6W6L               | 1000 | 2   | 20 µs |
| 87 | Atp13a1 (1)                                                                                        | <i>H. sapiens</i>    | ID: Q9HD20              | 800  | 26  | 20 µs |
| 88 | Atp13a1 (1)                                                                                        | <i>M. musculus</i>   | ID: Q9EPE9              | 800  | 20  | 20 µs |
| 89 | Shr3 (1)                                                                                           | <i>S. cerevisiae</i> | ID: Q02774              | 800  | 3   | 20 µs |
| 90 | Hrd1 (1)                                                                                           | <i>S. cerevisiae</i> | PDB: 6VJZ               | 800  | 22  | 20 µs |
| 91 | Der1 (1)                                                                                           | <i>S. cerevisiae</i> | PDB: 6VJZ               | 800  | 1   | 20 µs |
| 92 | Hrd1-Der1 (2)                                                                                      | <i>S. cerevisiae</i> | PDB: 6VJZ               | 800  | 28  | 20 µs |
| 93 | ERAD complex (4)                                                                                   | <i>S. cerevisiae</i> | PDB: 6VJZ               | 800  | 32  | 20 µs |
| 94 | Sec61 α - Sec61 γ (2)                                                                              | <i>C. familiaris</i> | PDB: 6Z3T               | 800  | 98  | 20 µs |
| 95 | SEC61 complex (3)                                                                                  | <i>H. sapiens</i>    | PDB: 8DNV               | 800  | 26  | 20 µs |
| 96 | SEC61 complex (3)                                                                                  | <i>H. sapiens</i>    | PDB: 8DNW               | 800  | 42  | 20 µs |
| 97 | Sec61 α (1)                                                                                        | <i>H. sapiens</i>    | PDB: 8B6L               | 800  | 46  | 20 µs |

|     |                                                  |                      |           |      |     |            |
|-----|--------------------------------------------------|----------------------|-----------|------|-----|------------|
| 98  | Sec61 $\beta$ (1)                                | <i>H. sapiens</i>    | PDB: 8B6L | 800  | 0   | 20 $\mu$ s |
| 99  | Sec61 $\gamma$ (1)                               | <i>H. sapiens</i>    | PDB: 8B6L | 800  | 0   | 20 $\mu$ s |
| 100 | SEC61 complex (3)                                | <i>H. sapiens</i>    | PDB: 8B6L | 800  | 13  | 20 $\mu$ s |
| 101 | Trap $\alpha$ (1)                                | <i>H. sapiens</i>    | PDB: 8B6L | 800  | 0   | 20 $\mu$ s |
| 102 | Trap $\beta$ (1)                                 | <i>H. sapiens</i>    | PDB: 8B6L | 800  | 0   | 20 $\mu$ s |
| 103 | Trap $\gamma$ (1)                                | <i>H. sapiens</i>    | PDB: 8B6L | 800  | 20  | 20 $\mu$ s |
| 104 | Trap $\delta$ (1)                                | <i>H. sapiens</i>    | PDB: 8B6L | 800  | 0   | 20 $\mu$ s |
| 105 | Trap $\beta$ - Trap $\delta$ - Trap $\gamma$ (3) | <i>H. sapiens</i>    | PDB: 8B6L | 800  | 4   | 20 $\mu$ s |
| 106 | TRAP complex (4)                                 | <i>H. sapiens</i>    | PDB: 8B6L | 800  | 7   | 20 $\mu$ s |
| 107 | SEC61 complex - TRAP complex (7)                 | <i>H. sapiens</i>    | PDB: 8B6L | 1000 | 26  | 20 $\mu$ s |
| 108 | RPN1 (1)                                         | <i>H. sapiens</i>    | PDB: 8B6L | 800  | 0   | 20 $\mu$ s |
| 109 | RPN2 (1)                                         | <i>H. sapiens</i>    | PDB: 8B6L | 1200 | 0   | 20 $\mu$ s |
| 110 | OST4 (1)                                         | <i>H. sapiens</i>    | PDB: 8B6L | 600  | 1   | 20 $\mu$ s |
| 111 | OST48 (1)                                        | <i>H. sapiens</i>    | PDB: 8B6L | 800  | 1   | 20 $\mu$ s |
| 112 | DAD1 (1)                                         | <i>H. sapiens</i>    | PDB: 8B6L | 600  | 32  | 20 $\mu$ s |
| 113 | STT3a (1)                                        | <i>H. sapiens</i>    | PDB: 8B6L | 800  | 50  | 20 $\mu$ s |
| 114 | TMEM258 (1)                                      | <i>H. sapiens</i>    | PDB: 8B6L | 600  | 3   | 20 $\mu$ s |
| 115 | OSTC (1)                                         | <i>H. sapiens</i>    | PDB: 8B6L | 800  | 132 | 20 $\mu$ s |
| 116 | OSTA complex (8)                                 | <i>H. sapiens</i>    | PDB: 8B6L | 1600 | 35  | 20 $\mu$ s |
| 117 | SEC61 complex - OSTA complex (11)                | <i>H. sapiens</i>    | PDB: 8B6L | 1600 | 35  | 20 $\mu$ s |
| 118 | SEC61 complex - TRAP complex - OSTA complex (15) | <i>H. sapiens</i>    | PDB: 8B6L | 1800 | 72  | 20 $\mu$ s |
| 119 | Tom5 (1)                                         | <i>S. cerevisiae</i> | PDB: 6UCU | 800  | 0   | 20 $\mu$ s |
| 120 | Tom6 (1)                                         | <i>S. cerevisiae</i> | PDB: 6UCU | 800  | 0   | 20 $\mu$ s |
| 121 | Tom7 (1)                                         | <i>S. cerevisiae</i> | PDB: 6UCU | 800  | 0   | 20 $\mu$ s |
| 122 | Tom22 (1)                                        | <i>S. cerevisiae</i> | PDB: 6UCU | 800  | 0   | 20 $\mu$ s |
| 123 | Tom40 (1)                                        | <i>S. cerevisiae</i> | PDB: 6UCU | 800  | 30  | 20 $\mu$ s |
| 124 | TOM complex (5)                                  | <i>S. cerevisiae</i> | PDB: 6UCU | 800  | 56  | 20 $\mu$ s |

|     |                                     |                      |                         |      |     |            |
|-----|-------------------------------------|----------------------|-------------------------|------|-----|------------|
| 125 | TOM complex (10)                    | <i>S. cerevisiae</i> | PDB: 6UCU               | 1200 | 119 | 20 $\mu$ s |
| 126 | BamA (1)                            | <i>E. coli</i>       | PDB: 6QGW               | 800  | 30  | 20 $\mu$ s |
| 127 | TamA (1)                            | <i>E. coli</i>       | PDB: 4C00               | 800  | 112 | 20 $\mu$ s |
| 128 | Oep80 (1)                           | <i>A. thaliana</i>   | ID: Q9C5J8              | 800  | 26  | 20 $\mu$ s |
| 129 | Sam50 (1)                           | <i>S. cerevisiae</i> | PDB: 7BTW               | 600  | 125 | 20 $\mu$ s |
| 130 | Sam50 (1)                           | <i>S. cerevisiae</i> | PDB: 7BTX               | 800  | 84  | 20 $\mu$ s |
| 131 | Sam50 - Sam50 (2)                   | <i>S. cerevisiae</i> | PDB: 7BTW               | 800  | 76  | 20 $\mu$ s |
| 132 | Sam50 - Mdm10 (2)                   | <i>S. cerevisiae</i> | PDB: 7BTY               | 800  | 54  | 20 $\mu$ s |
| 133 | Sam50 - Tom40 (2)                   | <i>S. cerevisiae</i> | PDB: 7E4H               | 800  | 77  | 20 $\mu$ s |
| 134 | SAM complex (3)                     | <i>S. cerevisiae</i> | PDB: 7BTX               | 800  | 54  | 20 $\mu$ s |
| 135 | Tim22 (1)                           | <i>S. cerevisiae</i> | PDB: 6LO8               | 800  | 127 | 20 $\mu$ s |
| 136 | Tim18 (1)                           | <i>S. cerevisiae</i> | PDB: 6LO8               | 800  | 56  | 20 $\mu$ s |
| 137 | Tim54 (1)                           | <i>S. cerevisiae</i> | PDB: 6LO8               | 800  | 5   | 20 $\mu$ s |
| 138 | Sdh3 (1)                            | <i>S. cerevisiae</i> | PDB: 6LO8               | 800  | 15  | 20 $\mu$ s |
| 139 | TIM22 complex (10)                  | <i>S. cerevisiae</i> | PDB: 6LO8               | 1000 | 246 | 20 $\mu$ s |
| 140 | Tim22 (1)                           | <i>H. sapiens</i>    | PDB: 7CGP               | 800  | 49  | 20 $\mu$ s |
| 141 | TIM22 complex (15)                  | <i>H. sapiens</i>    | PDB: 7CGP               | 1200 | 60  | 20 $\mu$ s |
| 142 | Tim23 (1)                           | <i>S. cerevisiae</i> | PDB: 8SCX               | 800  | 2   | 20 $\mu$ s |
| 143 | Tim17 (1)                           | <i>S. cerevisiae</i> | PDB: 8SCX               | 800  | 250 | 20 $\mu$ s |
| 144 | Tim17<br>D17L, D76L, E126L (1)      | <i>S. cerevisiae</i> | PDB: 8SCX               | 800  | 127 | 20 $\mu$ s |
| 145 | Mgr2 (1)                            | <i>S. cerevisiae</i> | ID: Q02889              | 800  | 27  | 20 $\mu$ s |
| 146 | Tim17 - Mgr2 (2)                    | <i>S. cerevisiae</i> | PDB: 8SCX<br>ID: Q02889 | 800  | 7   | 20 $\mu$ s |
| 147 | Tim17 - Mgr2 - Tim23 (3)            | <i>S. cerevisiae</i> | PDB: 8SCX<br>ID: Q02889 | 800  | 29  | 20 $\mu$ s |
| 148 | Tim17 - Tim23 - Tim44 -<br>Mgr2 (4) | <i>S. cerevisiae</i> | PDB: 8SCX<br>ID: Q02889 | 800  | 21  | 20 $\mu$ s |
| 149 | TIM23 complex (3)                   | <i>S. cerevisiae</i> | PDB: 8SCX               | 1000 | 157 | 20 $\mu$ s |
| 150 | Tim17 (1)                           | <i>H. sapiens</i>    | ID: Q99595              | 800  | 213 | 20 $\mu$ s |
| 151 | Tim17                               | <i>H. sapiens</i>    | ID: Q99595              | 800  | 124 | 20 $\mu$ s |

|     |                                        |                   |                                        |      |     |            |
|-----|----------------------------------------|-------------------|----------------------------------------|------|-----|------------|
|     | D16L, D77L, E127L (1)                  |                   |                                        |      |     |            |
| 152 | Tim23 (1)                              | <i>H. sapiens</i> | ID: O14925                             | 800  | 30  | 20 $\mu$ s |
| 153 | Tim17 - Tim23 (2)                      | <i>H. sapiens</i> | ID: Q99595<br>ID: O14925               | 800  | 182 | 20 $\mu$ s |
| 154 | Tim50 (1)                              | <i>H. sapiens</i> | ID: Q3ZCQ8                             | 1200 | 0   | 20 $\mu$ s |
| 155 | TIM23 complex (3)                      | <i>H. sapiens</i> | ID: Q99595<br>ID: O14925<br>ID: Q3ZCQ8 | 1000 | 170 | 20 $\mu$ s |
| 156 | MTCH1 (1)                              | <i>H. sapiens</i> | ID: Q9NZJ7                             | 600  | 129 | 20 $\mu$ s |
| 157 | MTCH2 (1)                              | <i>H. sapiens</i> | ID: Q9Y6C9                             | 800  | 126 | 20 $\mu$ s |
| 158 | MTCH2 Q29L, H142L,<br>D189L, N242L (1) | <i>H. sapiens</i> | ID: Q9Y6C9                             | 800  | 93  | 20 $\mu$ s |
| 159 | MTCH2-peptide (2)                      | <i>H. sapiens</i> | ID: Q9Y6C9                             | 800  | 2   | 20 $\mu$ s |
| 160 | SLC25A46 (1)                           | <i>H. sapiens</i> | ID: Q96AG3                             | 800  | 22  | 20 $\mu$ s |
| 161 | SLC26A9 (2)                            | <i>H. sapiens</i> | PDB: 7CH1                              | 1000 | 35  | 20 $\mu$ s |
| 162 | SLC25A17 (1)                           | <i>H. sapiens</i> | ID: O43808                             | 800  | 20  | 20 $\mu$ s |

Supporting Figures

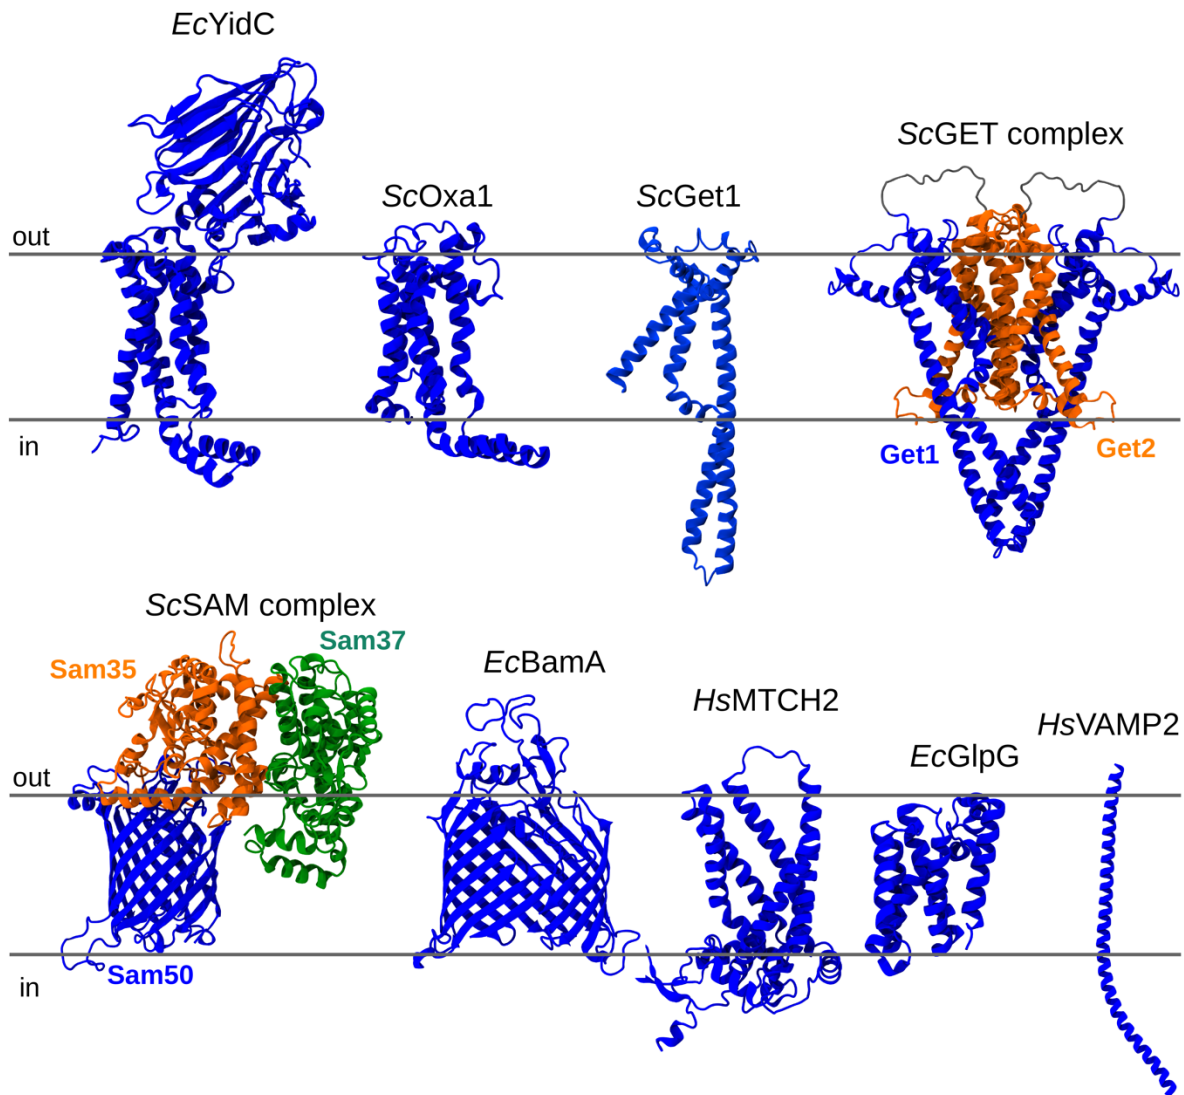

Figure S1. 3D structure of experimentally tested proteins.



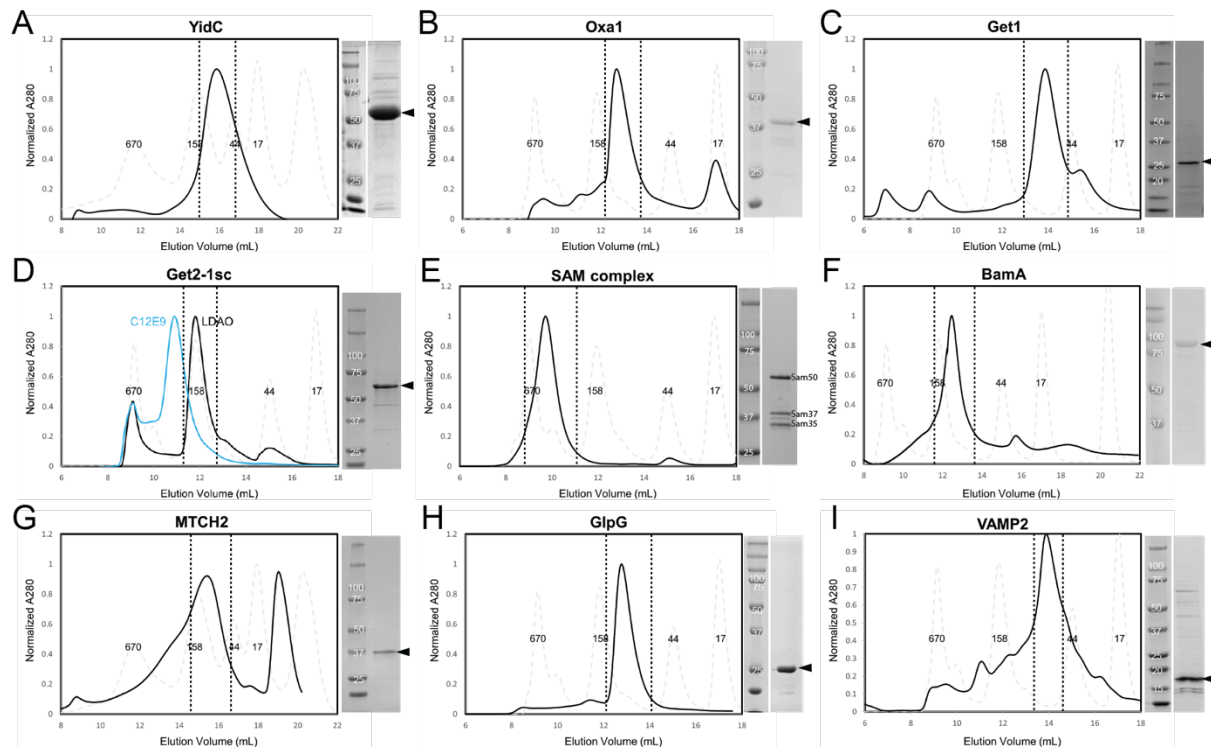

**Figure S2. Size-exclusion chromatography analyses of proteins used in reconstitutions.** Proteins for *in vitro* reconstitution were purified by affinity followed by size exclusion chromatography. Traces are shown (black) along with traces of the molecular weight standards (dotted grey); fractions used for reconstitutions are indicated (dotted black lines). Note that the elution volume of each protein reflects its size including detergent micelle. SDS-PAGE analysis of the purified protein is to the right of each chromatographic trace.

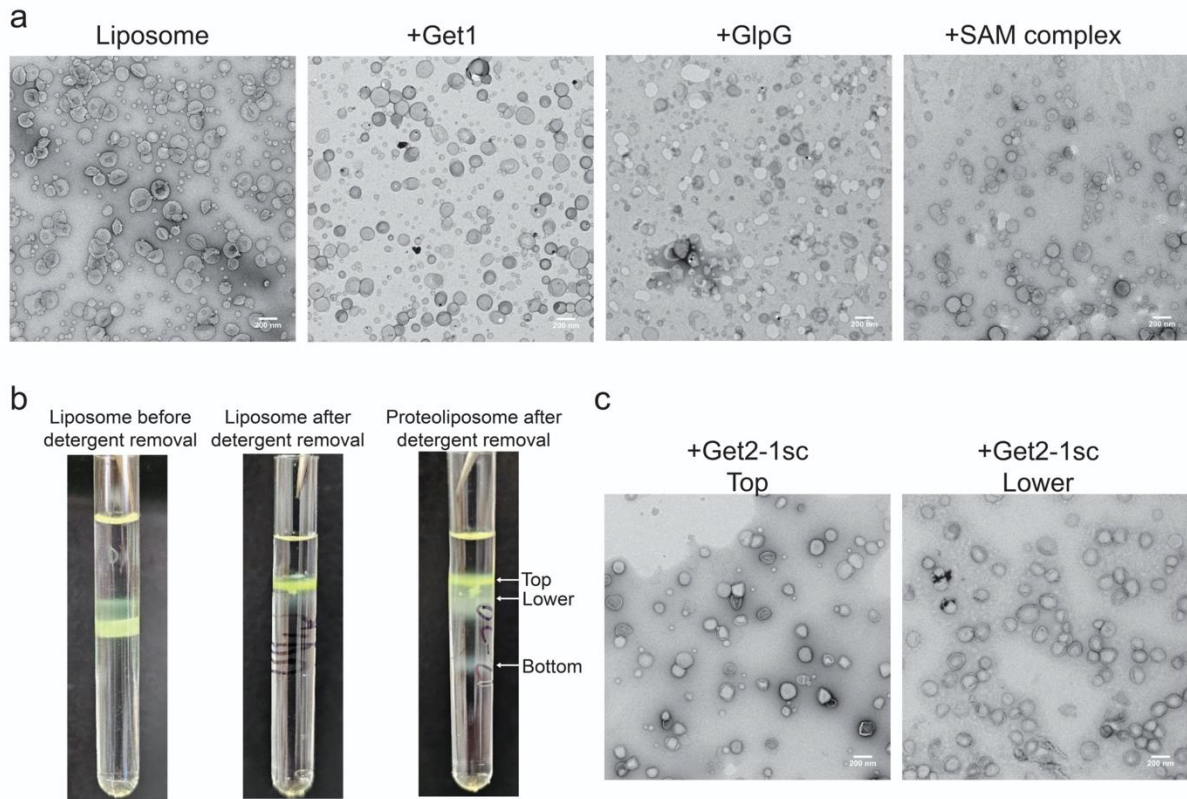

**Figure S3. Liposome characterization by negative staining TEM and liposome floatation.** (a) Examples of floated liposomes and proteoliposomes used for the scramblase assay as assessed by negative stain TEM. The preparations comprise both ~200nm diameter liposomes formed by extrusion as well as tiny liposomes remaining from the rehydration process (<50nm). (b) Detergent-treated liposomes, where detergent is not removed with Biobeads, likely have lesions that allow them to absorb Optiprep solution, making them sink in the density gradient (left panel). Same liposomes treated with Biobeads to remove detergent, and so presumably intact, float at the top (middle panel). Proteoliposomes used in our assays float near the top (right panel: layers labeled "top" and "lower"); a "bottom" fraction most likely has lesions and was (discarded). Proteoliposomes are expected to be heavier than protein-free liposomes and to concentrate in the fraction labelled "lower" versus the very "top". (c) Negative stain analysis of the proteoliposomes in the very "top" layer (in b, right) shows a mixture of 200nm and <50nm liposomes, whereas the "lower" fraction (in b, right) only has 200nm vesicles. The tiny liposomes likely are refractory to protein reconstitution due to their high curvature, and are expected to be lighter than proteoliposomes.

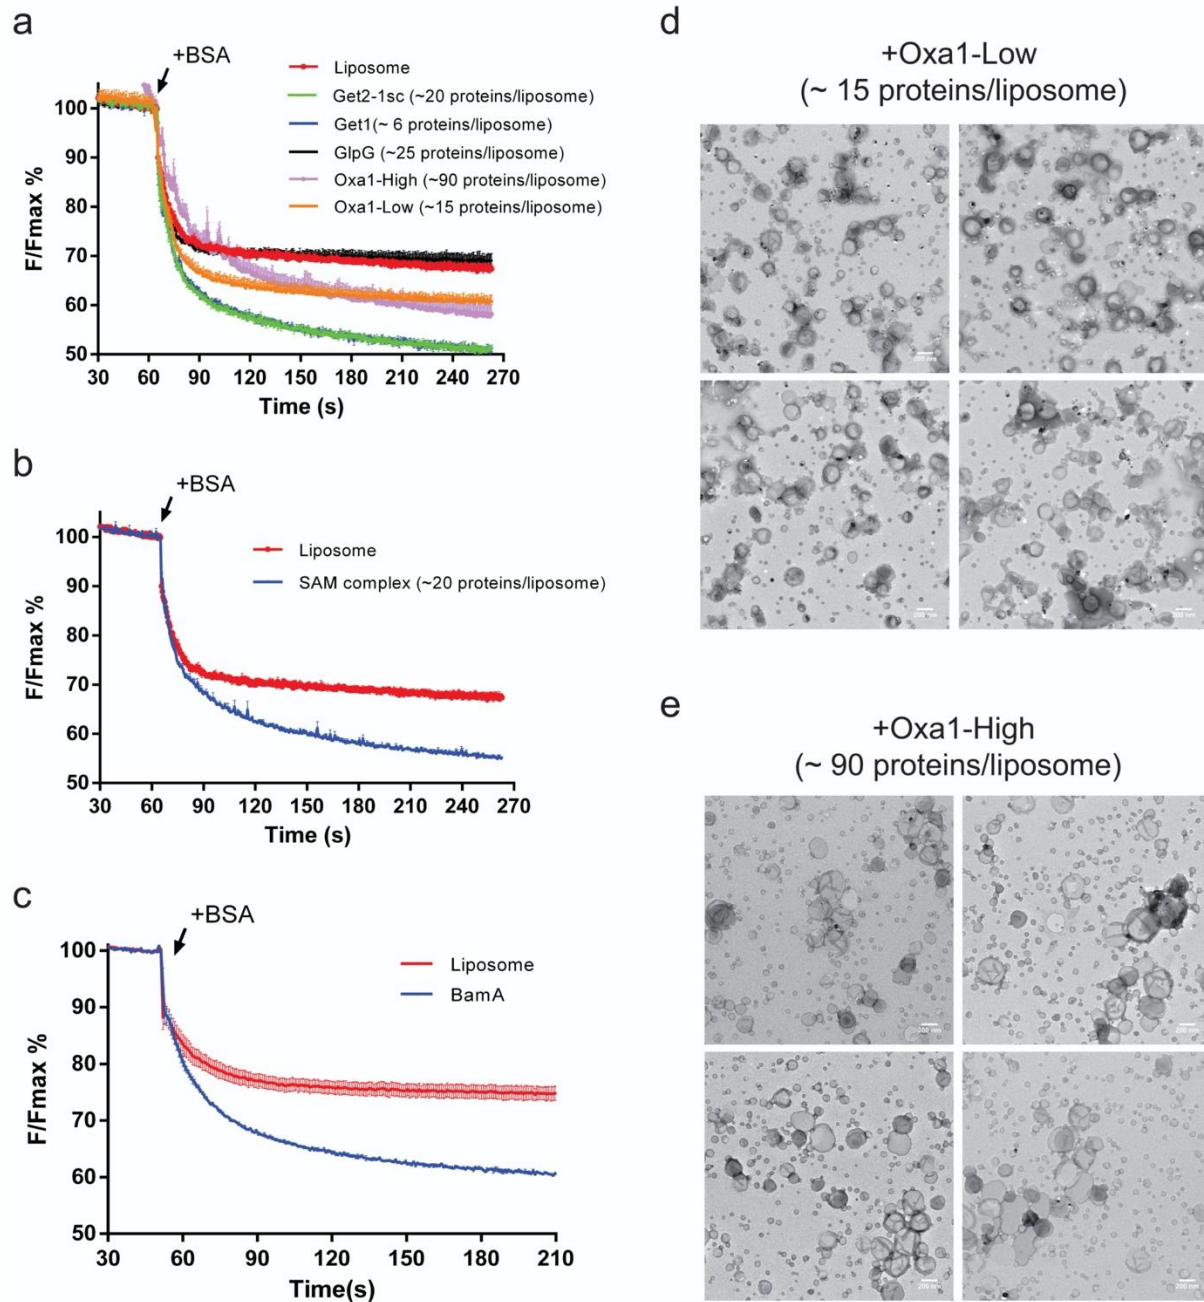

**Figure S4. Scrambling activity measured by spectrofluorometer confirms the fast scrambling of Get1, Get2-1sc, the Sam50 complex, BamA and Oxa1 (at lower concentrations).** (a) Get1, Get2-1sc, Oxa1 at lower protein concentration (~15 proteins/liposome), but not GlpG (~25 proteins/liposome), show fast scrambling. The traces of fluorescence decay show a similar  $t_{1/2}$  (~7s) for both protein-free liposomes and proteoliposomes, suggesting the rate-limiting step is BSA back-extraction and quenching rather than lipid scrambling. Oxa1 at higher protein concentration (~90 proteins/liposome) show slower fluorescence decay. (b,c) Similarly, BamA and the SAM50 complex show fast scrambling as assessed by spectrofluorometer. (d,e) As shown by negative-staining electron microscopy, the Oxa1 traces that appear to drop slowly in (a) and in Fig. 1c are likely the result of liposome clustering/aggregation, which hinders BSA access to the membrane and slows back-extraction.



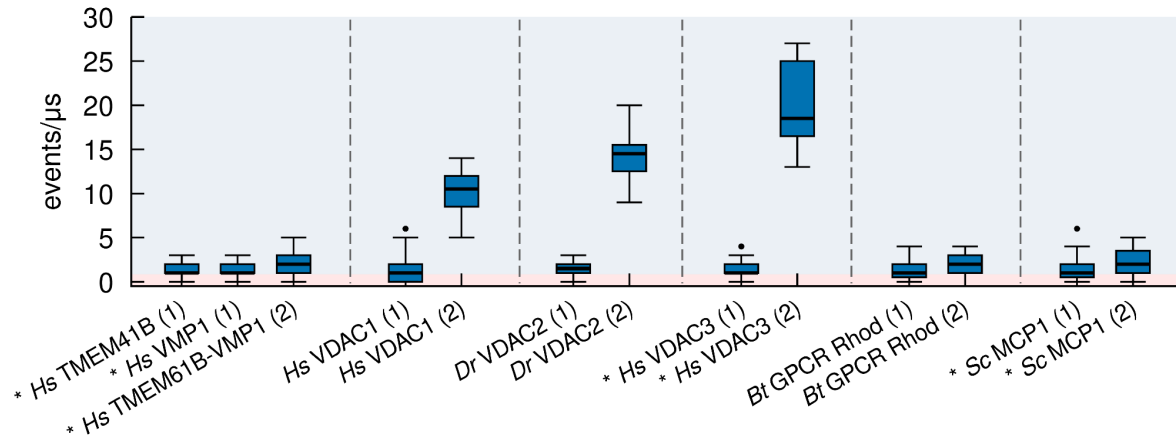

**Figure S5. Oligomerization influences lipid scrambling.** Comparison of lipid scrambling activity between monomeric and dimeric forms of selected scramblases. The blue shaded region represents the behavior for a scrambling-positive protein and the red area for a scrambling-negative protein. AlphaFold structures are denoted by the \* symbol, oligomerization state is in parenthesis.

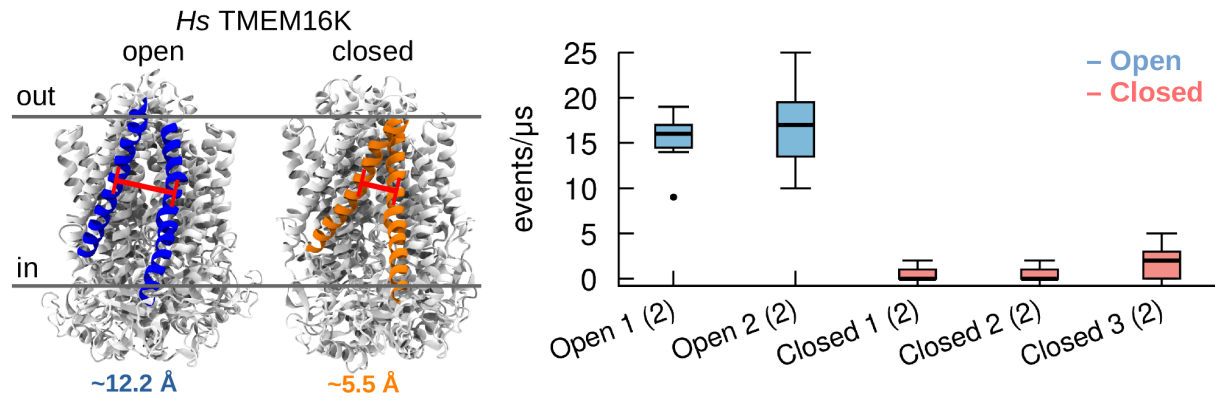

**Figure S6. CG-MD simulations recapitulate conformational-dependent lipid scrambling activity by TMEM16K.** Left: representative open and closed structures of TMEM16K. Right: Lipid scrambling events in different simulations of TMEM16K.

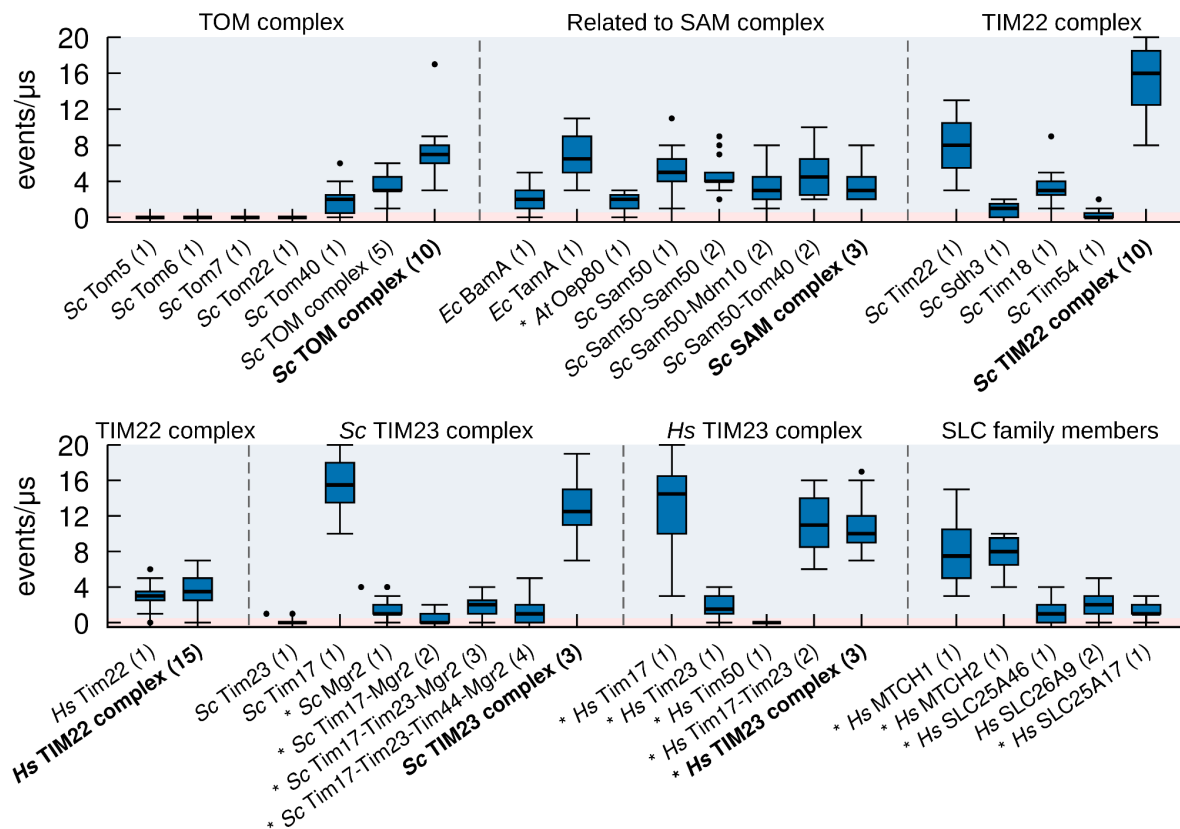

**Figure S7. Extended version of insertase complexes in the mitochondria.** Lipid scrambling activity of individual components and selected complexes for the major mitochondrial insertases investigated. The blue shaded region represents the behavior for a scrambling-positive protein and the red area for a scrambling-negative protein. AF structures are denoted by the \* symbol, oligomerization state is in parenthesis.

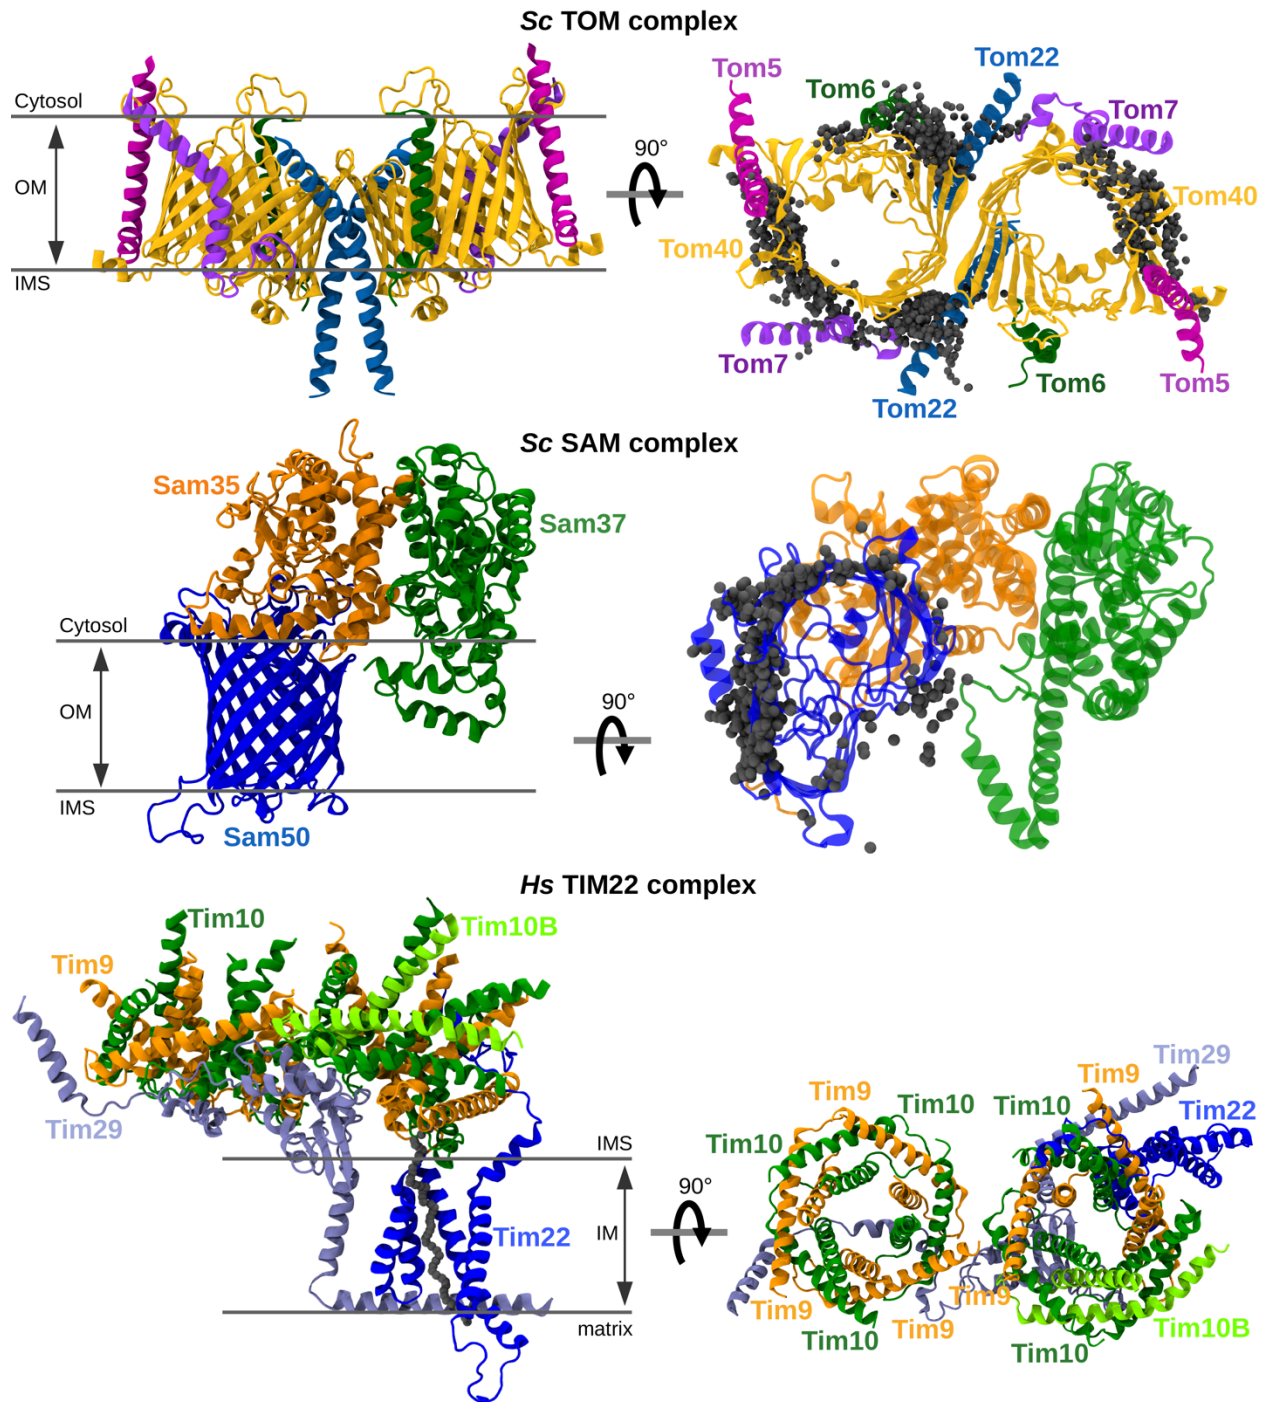

**Figure S8. 3D structures of mitochondrial complexes TOM, SAM and HsTIM22.** The main lipid scrambling pathways are shown in gray beads. Since for the TOM and SAM complexes (mainly beta-barrels) more than one clearly path was observed, the path for all lipid scrambling events is shown. OM: outer membrane, IM: inner membrane, IMS: inter membrane space.



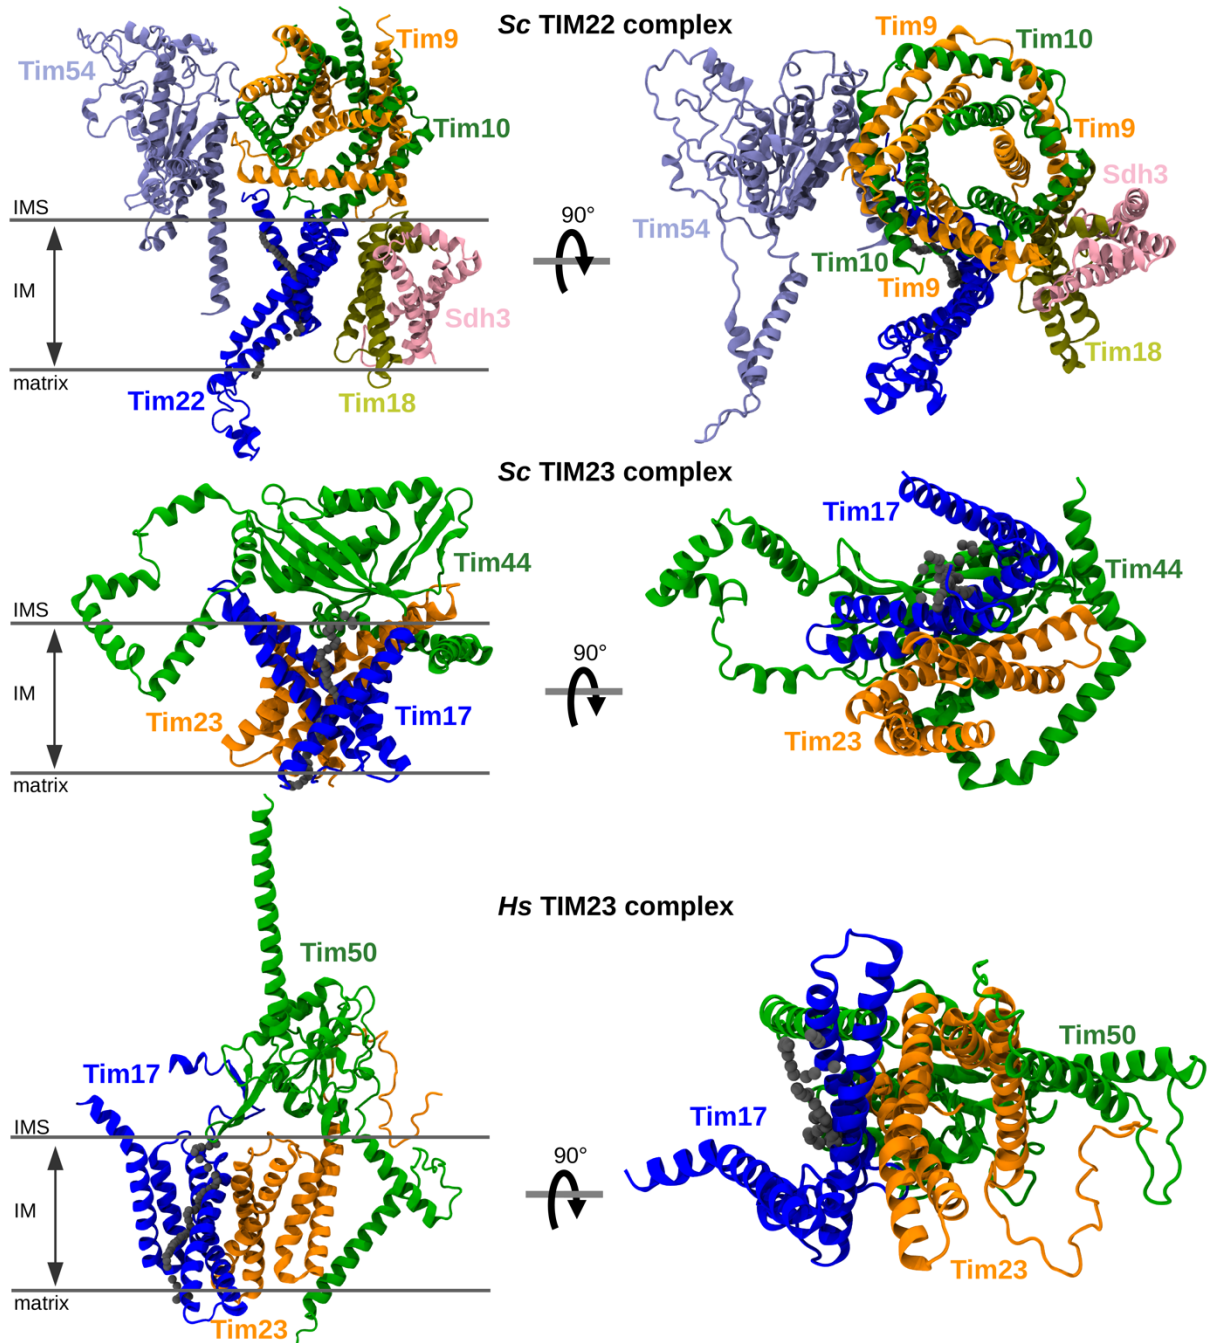

**Figure S9. 3D structures of mitochondrial complexes ScTIM22, ScTIM23, HsTIM23.** The main lipid scrambling pathways are shown in gray beads. IM: inner membrane; IMS: inter membrane space.

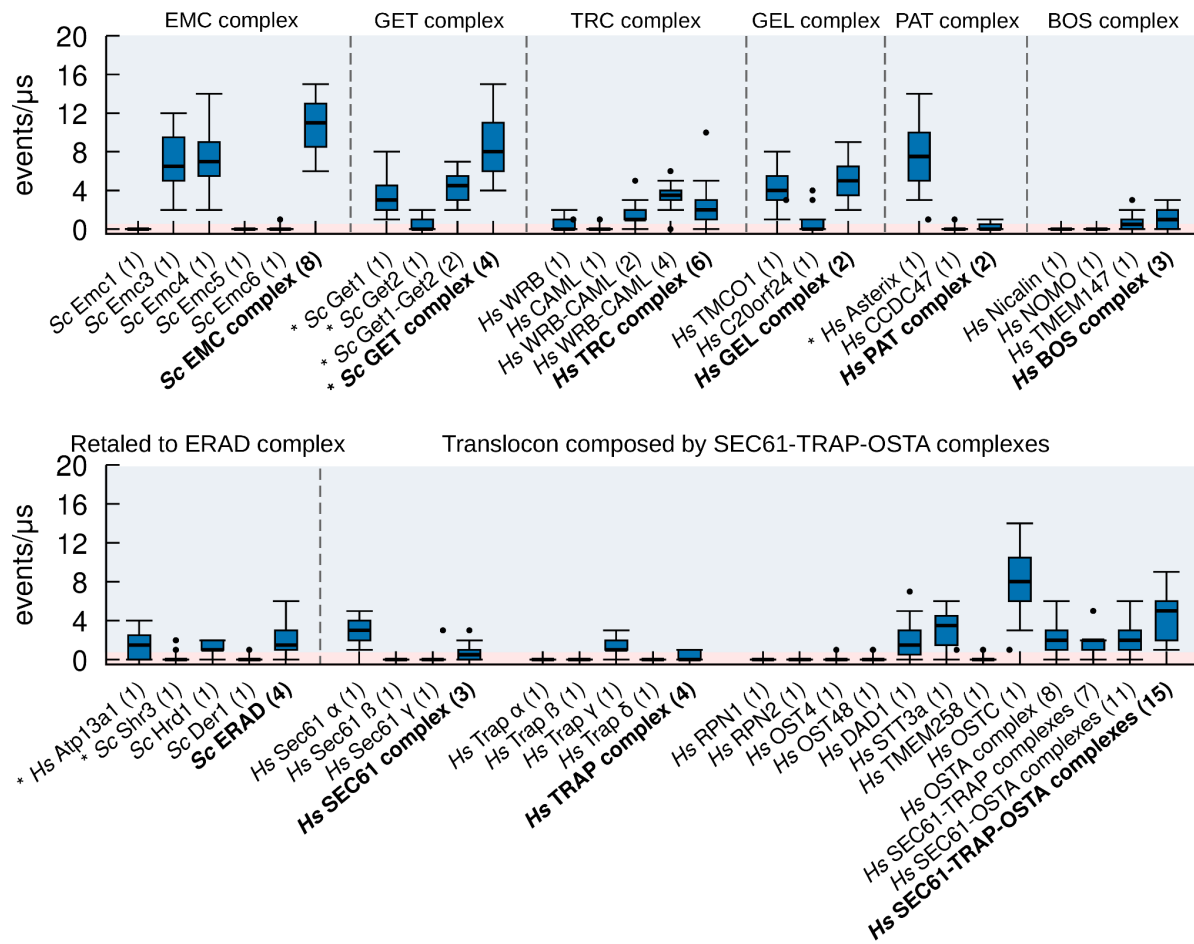

**Figure S10. Extended version of insertase complexes in the endoplasmic reticulum.** Lipid scrambling activity of individual components and selected complexes for the major ER insertases investigated. The blue shaded region represents the behavior for a scrambling-positive protein and the red area for a scrambling-negative protein. AlphaFold structures are denoted by the \* symbol, oligomerization state is in parenthesis.

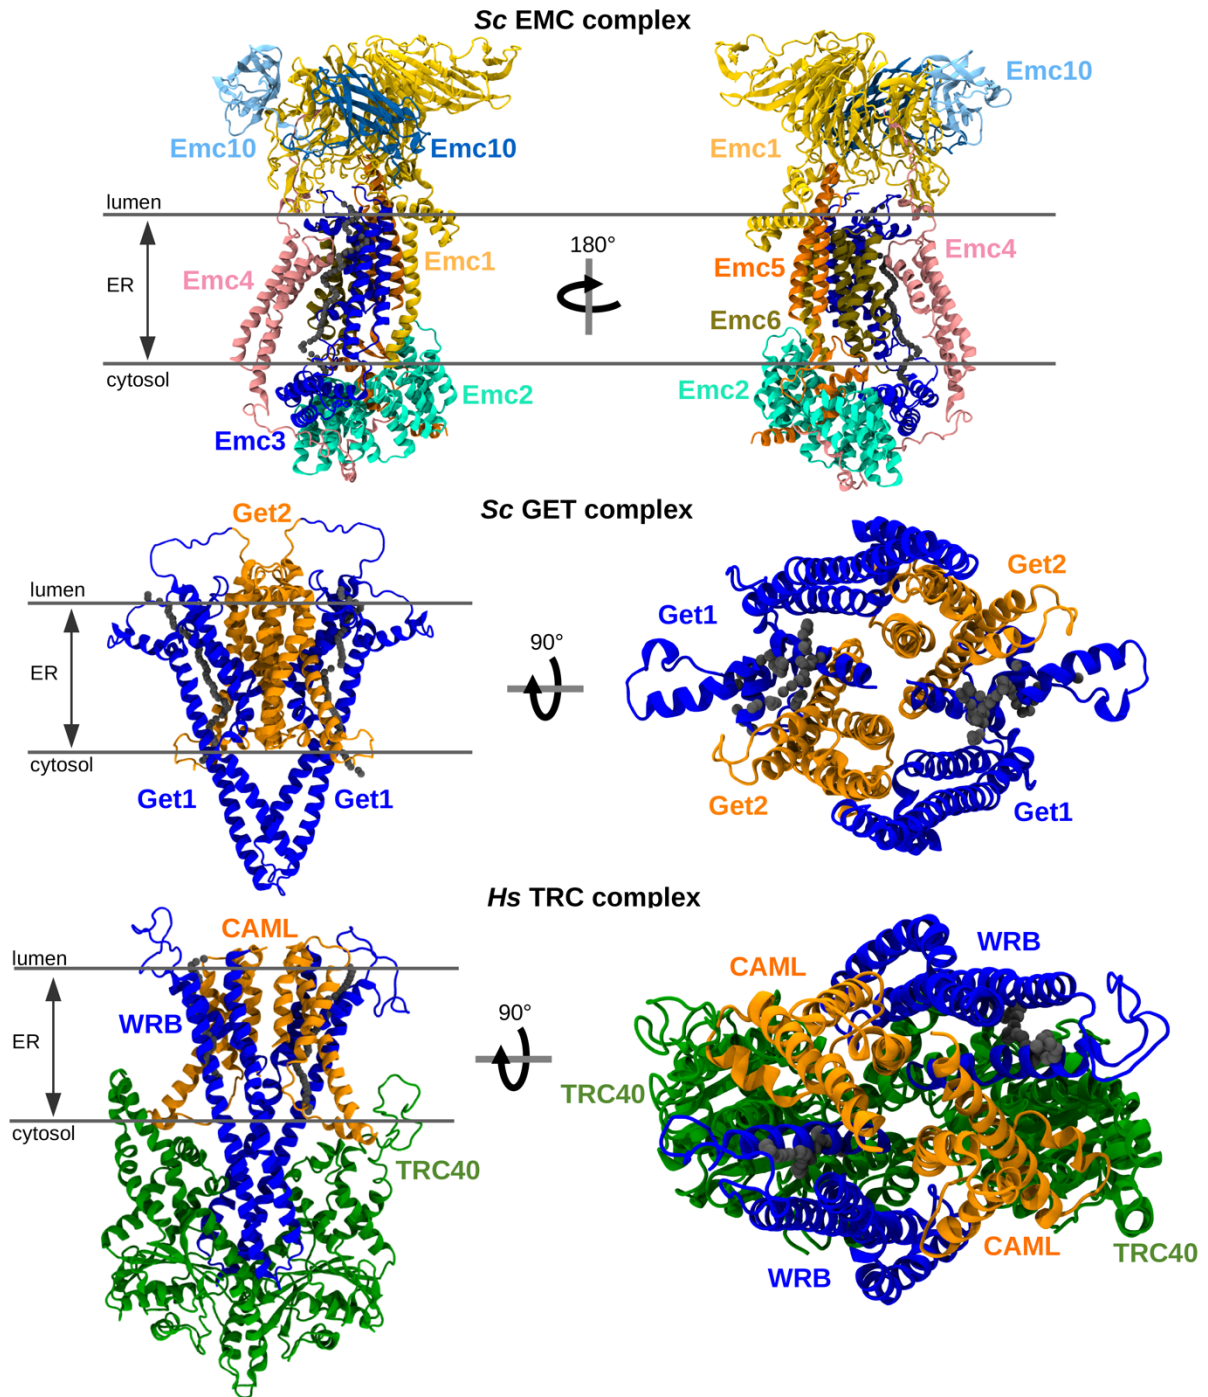

**Figure S11. 3D structures of ER complexes EMC, GET and TRC. The main lipid scrambling pathways are shown in gray beads.**

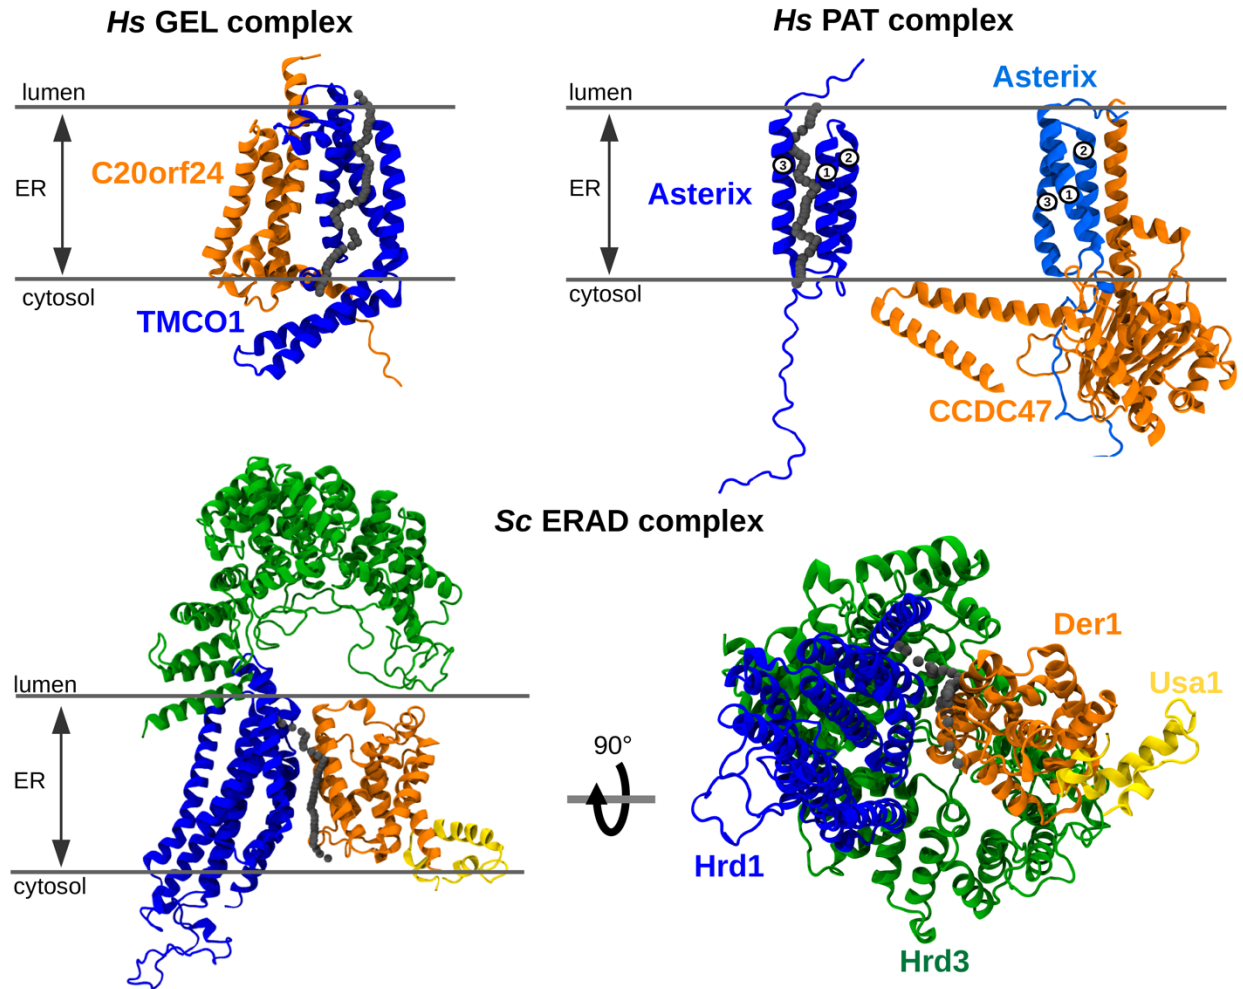

**Figure S12. 3D structures of ER complexes GEL, PAT, ERAD.** The main lipid scrambling pathways are shown in gray beads. Asterix's three helices are numbered to highlight the conformational change of Asterix following the presence of its partner CCDC47.

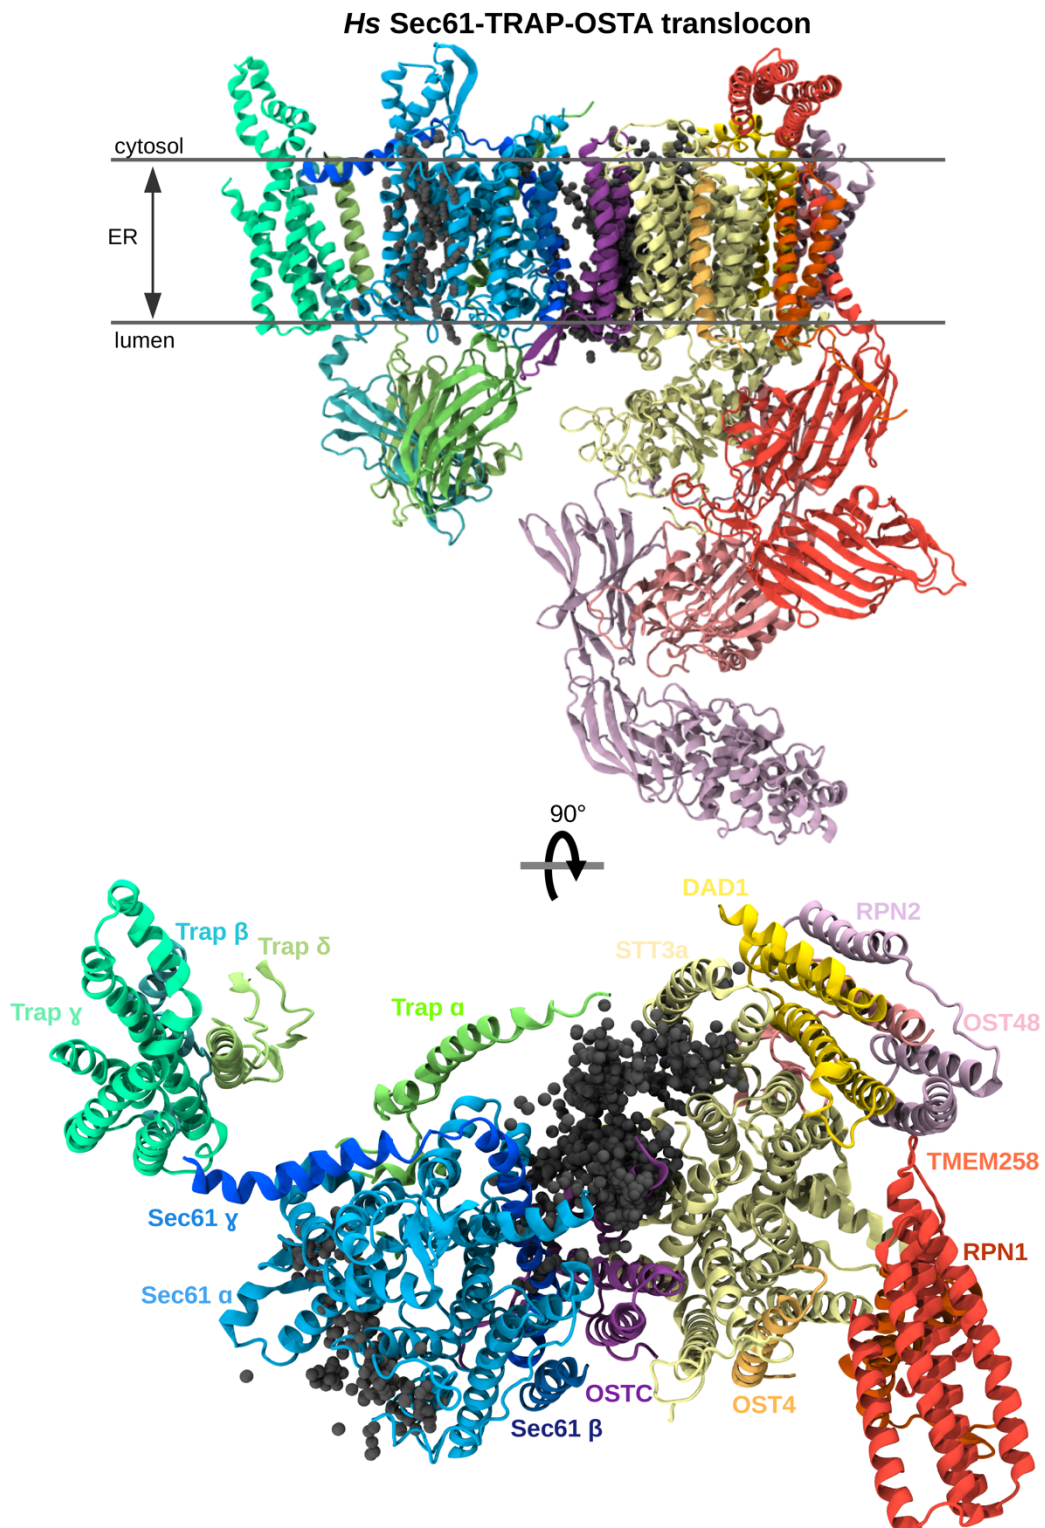

**Figure S13. 3D structure of HsSEC61-TRAP-OSTA complex.** The lipid scrambling pathways for all the events obtained in one replica are shown in gray beads.

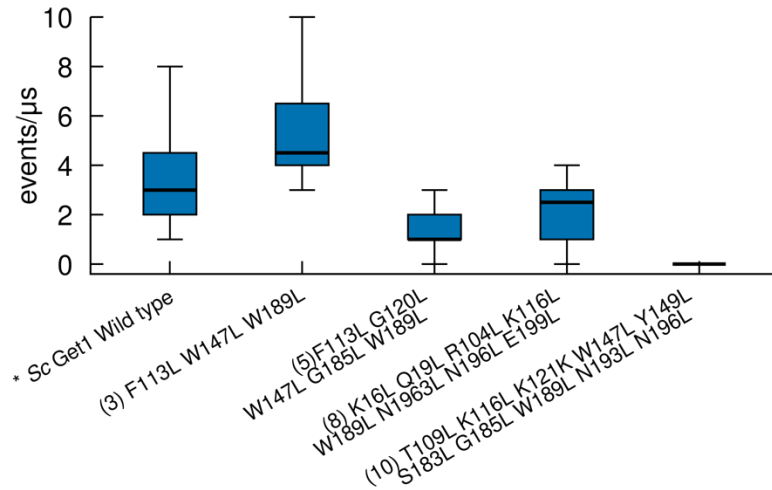

**Figure S14. In silico mutational analysis of lipid scrambling in Get1.** Scrambling activity calculations from CG-MD simulations of the wild type and various mutants of the ScGet1 subunit. 10 mutations (10L) are required to completely ablate lipid scrambling activity in ScGet1.
